# Supplementary material
Source: MDPI journal article supplement (https://www.mdpi.com/2624-8549/5/1/48)
Supplement: s1 [file s1]

## *Supporting Information*

### Stimuli responsive designer supramolecular polymer gel

M. Douzapau,<sup>a</sup> Srayoshi Roy Chowdhury,<sup>a</sup> Surajit Singh,<sup>a</sup> Olamilekan Joseph Ibukun,<sup>a</sup> and Debasish Haldar<sup>\*a</sup>

Department of Chemical Sciences, Indian Institute of Science Education and Research  
Kolkata, Mohanpur -741246, West Bengal, India.

Fax: (+)913325873020; Tel: +913325873119;

**Corresponding Author** E-mail: deba\_h76@yahoo.com; deba\_h76@iiserkol.ac.in (D. H.)

## Table of contents

|                                                              |             |
|--------------------------------------------------------------|-------------|
| <i>1. Figure S1</i>                                          | <i>S3</i>   |
| <i>2. Figure S2</i>                                          | <i>S3</i>   |
| <i>3. Figure S3</i>                                          | <i>S4</i>   |
| <i>4. Figure S4</i>                                          | <i>S5</i>   |
| <i>5. Table S1</i>                                           | <i>S6</i>   |
| <i>6. Synthetic scheme of peptide 1 Scheme S1</i>            | <i>S7</i>   |
| <i>7. Synthesis and Characterization of compound 1 S5-S8</i> | <i>S7-9</i> |

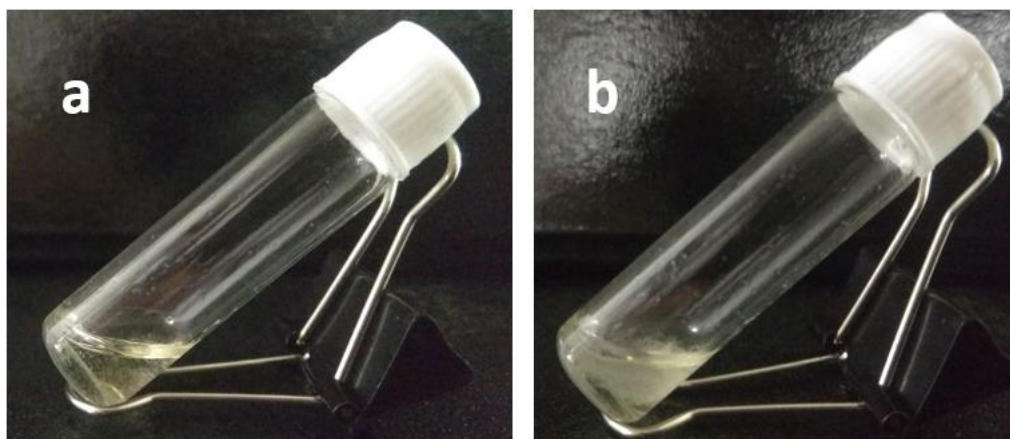

**Figure S1:** Images of (a) Compound **1** and  $\alpha$ -CD in DMSO-H<sub>2</sub>O showing no formation of gel; (b) Compound **1** and  $\gamma$ -CD in DMSO-H<sub>2</sub>O showing no formation of gel.

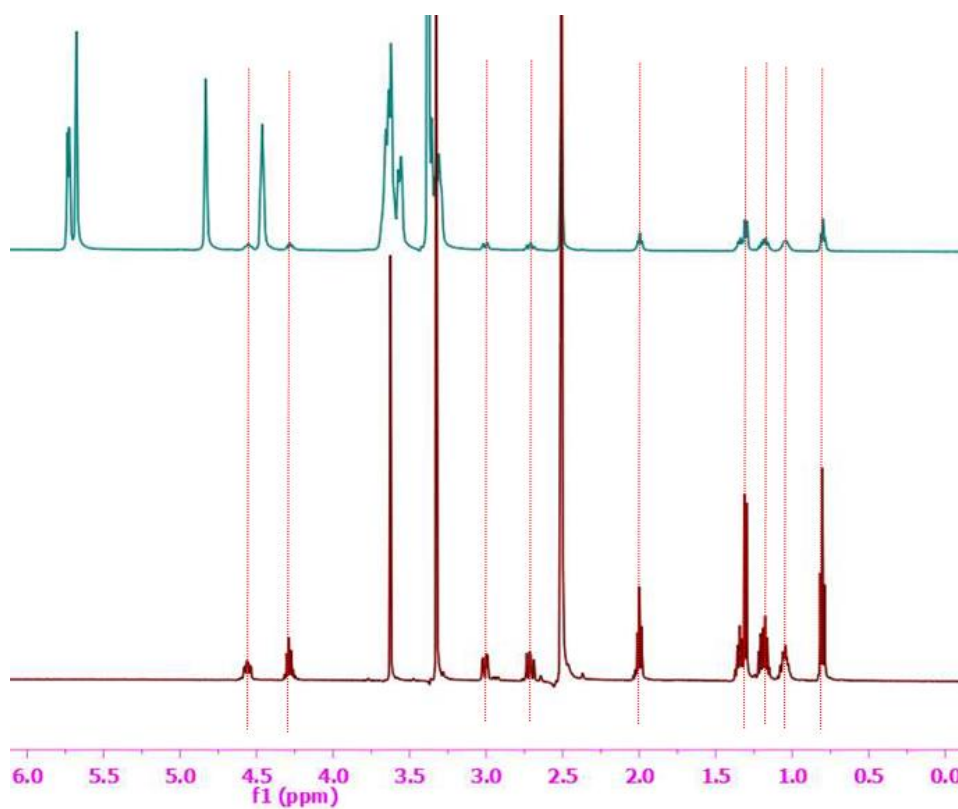

**Figure S2:** Part of the <sup>1</sup>H-NMR spectra of compound **1** and  $\beta$ -CD Gel in DMSO-D<sub>6</sub>, showing no change of compound **1** aliphatic peaks with addition of  $\beta$ -CD.

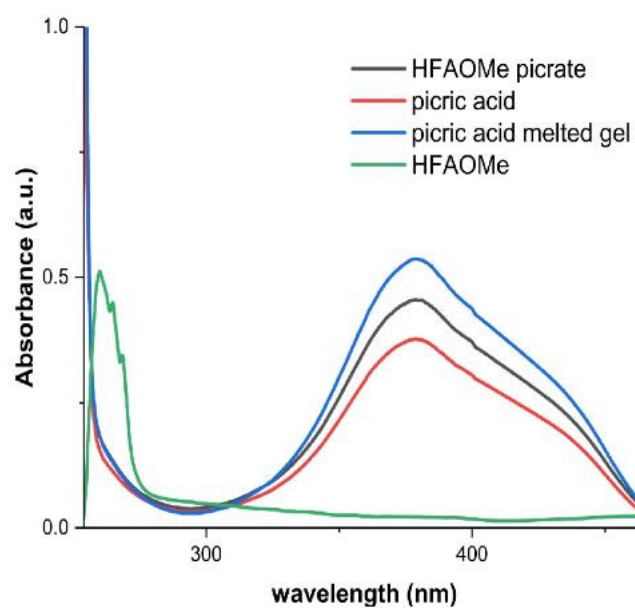

**Figure S3:** Absorption spectra of compound **1** (green), picric acid (red), compound **1**-picric acid (black), picric acid melted gel of compound **1** and  $\beta$ -CD in DMSO-H<sub>2</sub>O.

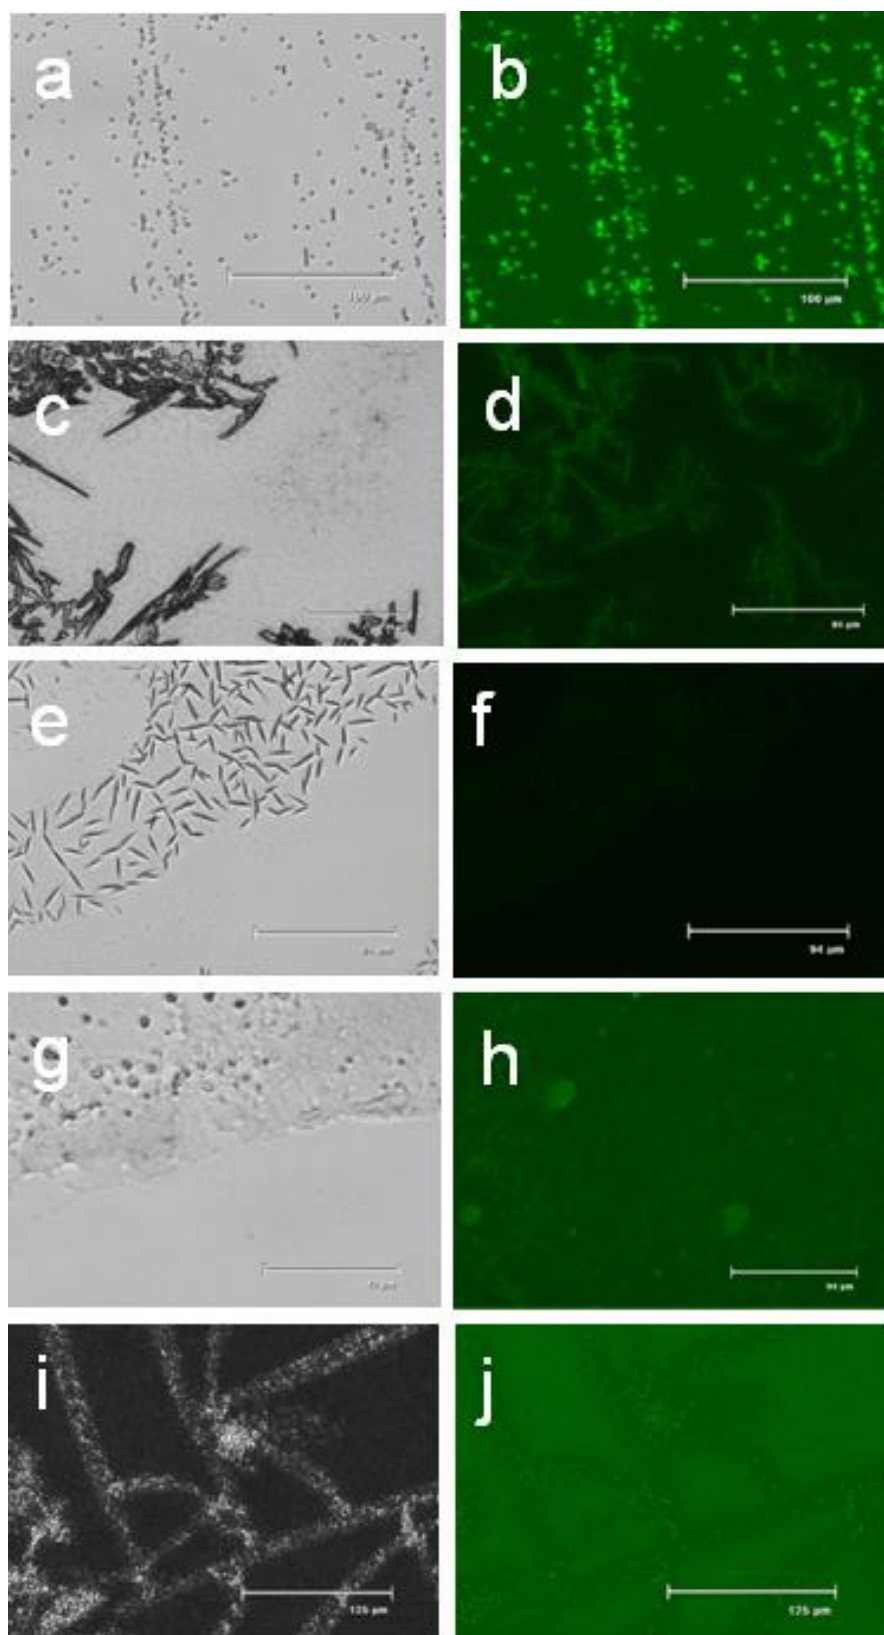

**Figure S4:** Fluorescence microscopy images of Compound **1** under (a) white light (b) greenlight, Picric acid under (c) white light (d) green light, Compound **1** + Picric acid under (e) white light (f) green light, Compound **1** +  $\beta$ -CD under (g) white light (h) green light, Picric acid melted Compound **1** +  $\beta$ -CD gel under (i) white light (j) green light.

|                                         |                                                               |
|-----------------------------------------|---------------------------------------------------------------|
| Empirical formula                       | C <sub>19</sub> H <sub>28</sub> N <sub>2</sub> O <sub>4</sub> |
| Formula weight                          | 348.44                                                        |
| Temperature/K                           | 100                                                           |
| Crystal system                          | monoclinic                                                    |
| Space group                             | <i>P</i> 21                                                   |
| <i>a</i> /Å                             | 11.1442(6)                                                    |
| <i>b</i> /Å                             | 4.8587(3)                                                     |
| <i>c</i> /Å                             | 17.6234(10)                                                   |
| $\alpha$ /°                             | 90                                                            |
| $\beta$ /°                              | 96.473(6)                                                     |
| $\gamma$ /°                             | 90                                                            |
| Volume/Å <sup>3</sup>                   | 974.99(10)                                                    |
| <i>Z</i>                                | 2                                                             |
| $\rho_{\text{calc}}$ /g/cm <sup>3</sup> | 1.221                                                         |
| $\mu$ /mm <sup>-1</sup>                 | 0.085                                                         |
| <i>F</i> (000)                          | 376                                                           |
| Crystal size/mm <sup>3</sup>            | 0.01 × 0.02 × 0.03                                            |
| Radiation                               | CuK $\alpha$ ( $\lambda$ = 0.71073)                           |
| 2 $\Theta$ range for data collection/°  | 41.8 to 25.0                                                  |
| Flack parameter                         | -1.2(7)                                                       |

**Table S1:** Crystal data and structure refinement for compound 1.

## Experimental Section:

The reported peptides were synthesized by conventional solution-phase methods using racemisation free fragment condensation strategy. For N-terminal protection, caproic acid used and the C- terminal was protected as a methyl ester. Coupling was mediated by dicyclohexylcarbodiimide /1-hydroxybenzotriazole (DCC/HOBt). The product was purified by column chromatography using the silica (100-200-mesh size) gel as a stationary phase and n-hexane-ethylacetate mixture as eluent. The final compounds were fully characterized by 400MHz  $^1\text{H}$  NMR spectroscopy,  $^{13}\text{C}$  NMR spectroscopy, mass spectrometry and IR Spectroscopy.

## The synthetic procedure of compound 1

The synthetic procedures are in the manuscript.

### Characterization of Compound 1.

$^1\text{H}$  NMR (500 MHz, DMSO- $d_6$ ,  $\delta$  ppm): 8.45-8.44 [1H, d, NH], 7.98-7.97 [1H, d, NH], 7.26-7.18 [5H, m, ArH], 4.59-4.53 [1H, m, Phe C $\alpha$ H], 4.32-4.24 [1H, m, Ala C $\alpha$ H], 3.63 [3H, s, OMe-H], 3.03-2.99 [1H, m, Phe-C $\beta$ H], 2.74-2.69 [1H, m, Phe-C $\beta$ H], 2.01-1.98 [2H, t, Aliphatic-H], 1.37-1.30 [4H, m, Aliphatic-H], 1.22-1.16 [3H, m, Ala-C $\beta$ H], 1.08-1.03 [2H, m, Aliphatic-H], 0.82-0.79 [3H, t, Aliphatic-H].  $^{13}\text{C}$  NMR (125 MHz,  $\text{CDCl}_3$ ,  $\delta$  ppm): 170.04, 170.3, 170.1, 130.7, 120.9, 120.8, 120.7, 50.4, 50.3, 40.8, 30.9, 30.1, 20.6, 20.2, 10.8, 10.4 ESI-MS (MeOH):  $m/z$  (Calc):  $\text{C}_{19}\text{H}_{28}\text{N}_2\text{O}_4\text{Na}$   $[\text{M}+\text{Na}]^+$  371.44; found: 371.08. Yield: 70%. White colour solid.

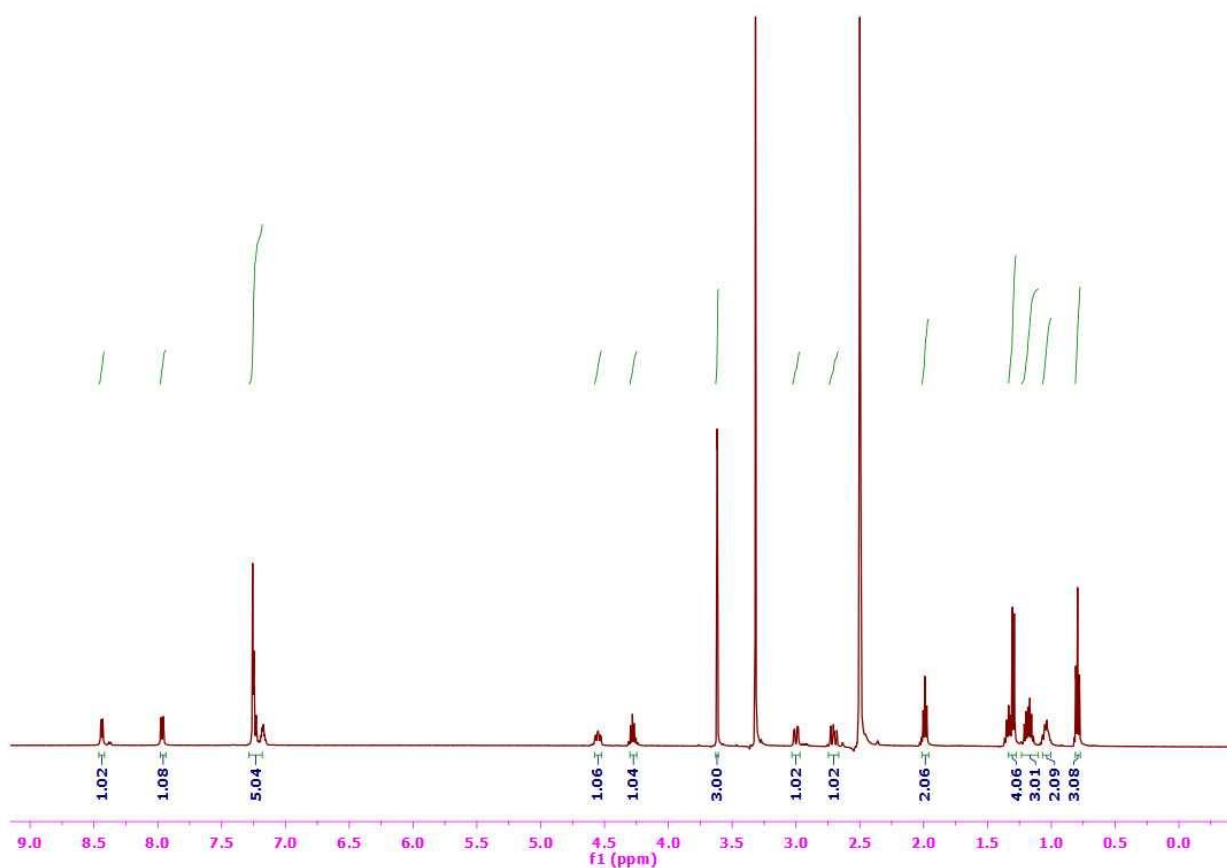

**Figure S5:**  $^1\text{H}$  NMR (500MHz,  $\text{DMSO}-d_6$ ,  $\delta$  in ppm, 298K) spectra of compound **1**.

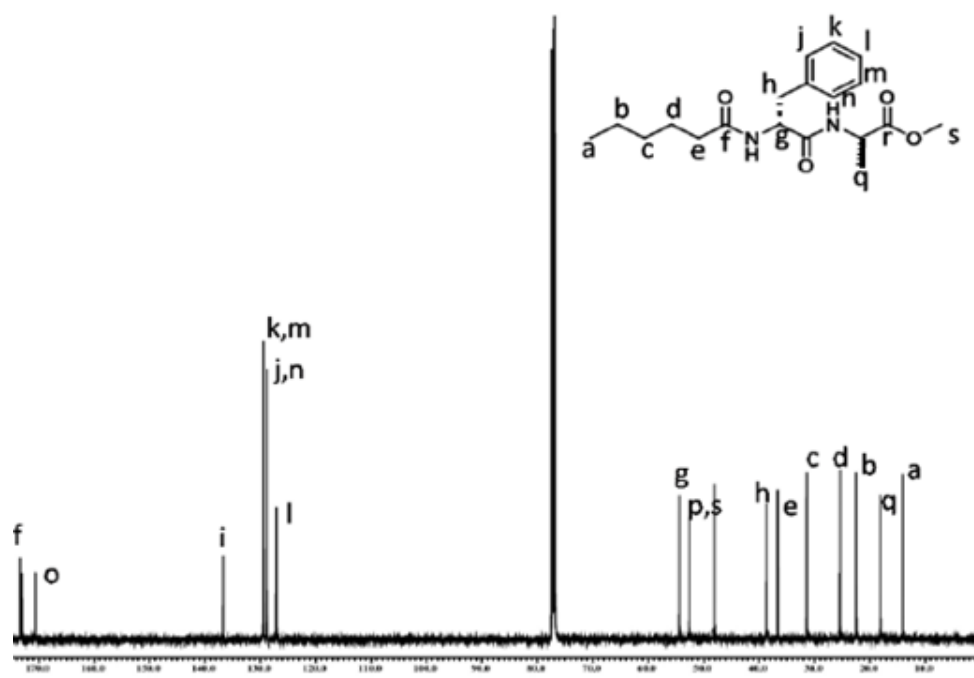

**Figure S6:**  $^{13}\text{C}$  NMR (125 MHz,  $\text{DMSO}-d_6$ ,  $\delta$  in ppm, 298K) spectra of compound **1**.



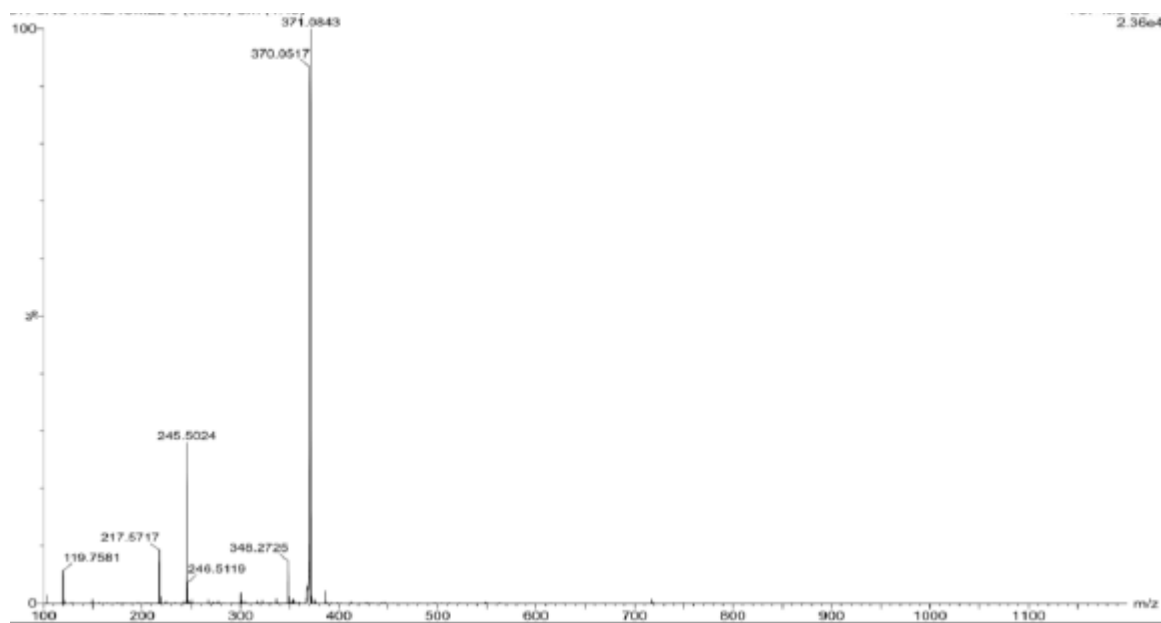

**Figure S7:** Mass spectra of Compound **1**.

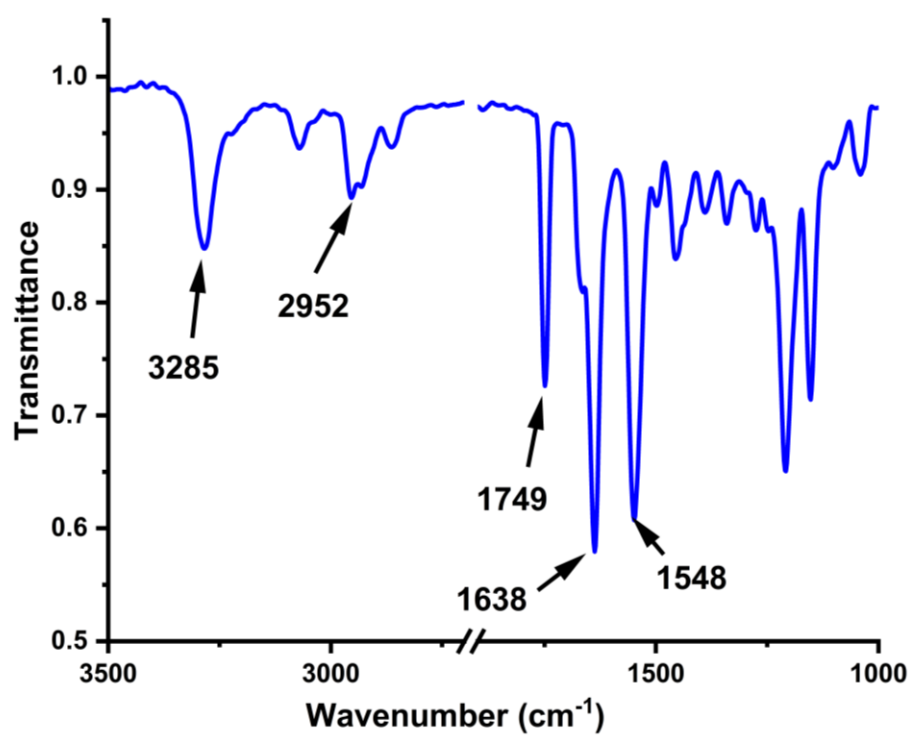

**Figure S8:** FT-IR spectra of compound **1**.
